# Supplementary material for: Naja naja atra Venom Protects against Manifestations of Systemic Lupus Erythematosus in MRL/lpr Mice
Source: Hindawi journal article supplement (doi:10.1155/2014/969482), 2014-01-01

S-figure1A

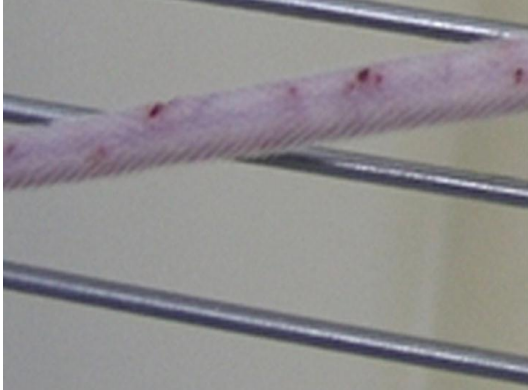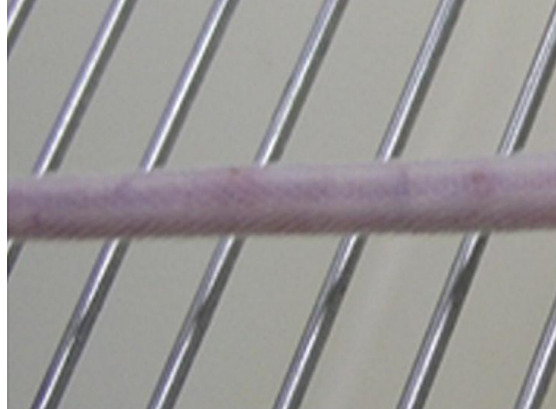

tail

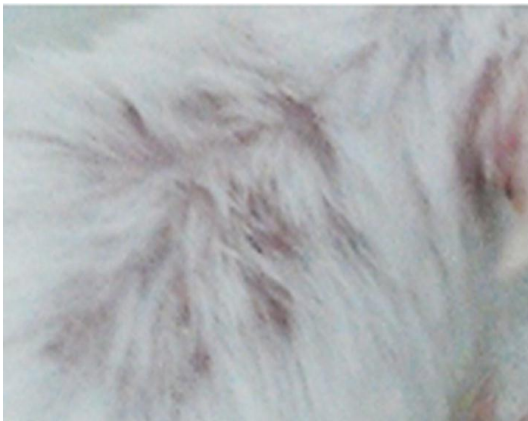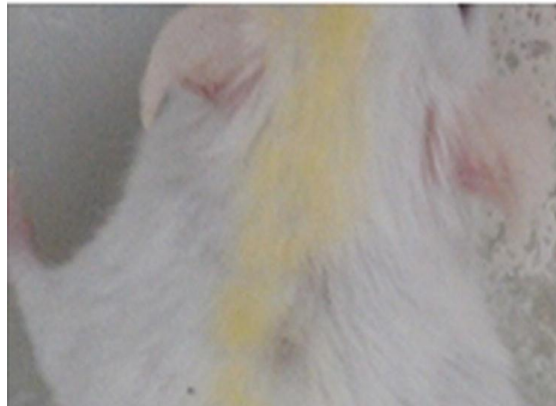

neck

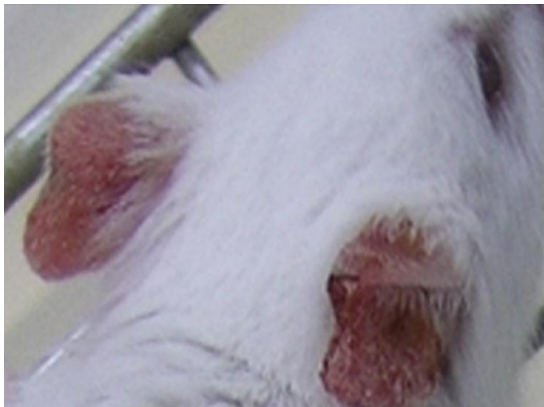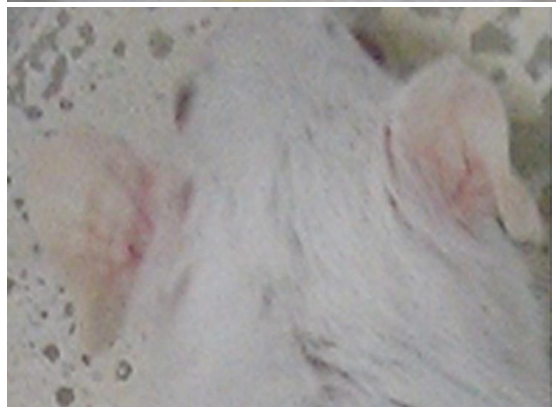

ear

model

NNAV

S-figure1B

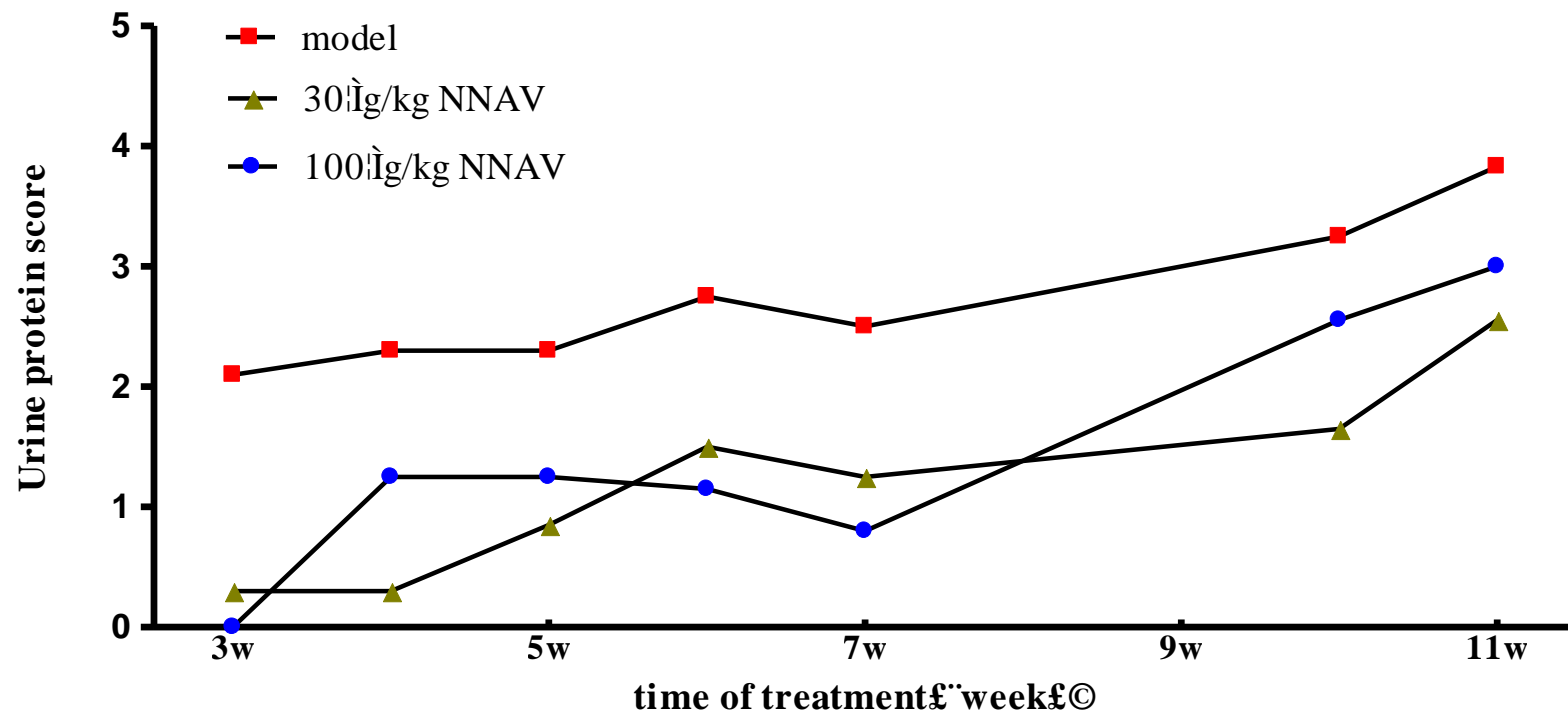

Supplement: f1 [file 969482.f1.pdf]
